# Supplementary material for: Characteristics of Antibiotic Resistance Genes and Antibiotic-Resistant Bacteria in Full-Scale Drinking Water Treatment System Using Metagenomics and Culturing
Source: Front Microbiol. 2022 Feb 22;12:798442. doi: 10.3389/fmicb.2021.798442 (PMC8902363; doi:10.3389/fmicb.2021.798442)
Supplement: Supplementary file 1 [file Data_Sheet_1.xlsx]

## Sheet: ARGs.taxa_anno
GeneID	ARG type	ARG subtype	Taxonomy	pathogen	Shared group
unigene_100304	beta-lactam	beta-lactam__TEM-171	k__Bacteria; p__Proteobacteria; c__Gammaproteobacteria; o__Enterobacteriales; f__Enterobacteriaceae; g__Escherichia; s__unclassified		A,F,G
unigene_10057783	bacitracin	bacitracin__bacA	k__Bacteria; p__Proteobacteria; c__Betaproteobacteria; o__Burkholderiales; f__Burkholderiaceae; g__Polynucleobacter; s__Polynucleobacter necessarius		A,C,E
unigene_10066775	bacitracin	bacitracin__bacA	k__Bacteria; p__Proteobacteria; c__Betaproteobacteria; o__Burkholderiales; f__Burkholderiaceae; g__Polynucleobacter; s__Polynucleobacter necessarius		A,B,C,E
unigene_10079624	bacitracin	bacitracin__bacA	Unclassified		C
unigene_10148783	bacitracin	bacitracin__bacA	k__Bacteria; p__Proteobacteria; c__Betaproteobacteria; o__Burkholderiales; f__Comamonadaceae; g__unclassified; s__unclassified		A,B,C,E
unigene_10214780	bacitracin	bacitracin__bacA	k__Bacteria; p__Proteobacteria; c__Betaproteobacteria; o__Burkholderiales; f__Comamonadaceae; g__Polaromonas; s__unclassified		A,B,C,E
unigene_10248061	multidrug	multidrug__mdtB	Unclassified		C
unigene_10249543	bacitracin	bacitracin__bacA	Unclassified		A,B,C
unigene_10283191	bacitracin	bacitracin__bacA	k__Bacteria; p__Proteobacteria; c__Betaproteobacteria; o__Burkholderiales; f__Comamonadaceae; g__Acidovorax; s__unclassified		A,B,C,E
unigene_10293325	rifamycin	rifamycin__rifampin monooxygenase	Unclassified		B,F
unigene_10385621	bacitracin	bacitracin__bacA	Unclassified		A,B,C,E
unigene_10393242	bacitracin	bacitracin__bacA	k__Bacteria; p__Proteobacteria; c__Betaproteobacteria; o__Burkholderiales; f__Comamonadaceae; g__unclassified; s__unclassified		A,B
unigene_10393450	bacitracin	bacitracin__bacA	k__Bacteria; p__Proteobacteria; c__Betaproteobacteria; o__Burkholderiales; f__Comamonadaceae; g__unclassified; s__unclassified		A,B,C,E
unigene_10487072	bacitracin	bacitracin__bacA	Unclassified		A,B
unigene_10495035	bacitracin	bacitracin__bacA	k__Bacteria; p__Proteobacteria; c__Betaproteobacteria; o__Burkholderiales; f__Comamonadaceae; g__Acidovorax; s__unclassified		A,B,C,E
unigene_10514401	bacitracin	bacitracin__bacA	k__Bacteria; p__Proteobacteria; c__Betaproteobacteria; o__Burkholderiales; f__Comamonadaceae; g__unclassified; s__unclassified		A,B,C,E
unigene_10549302	bacitracin	bacitracin__bacA	Unclassified		A,B,C,E
unigene_10572554	bacitracin	bacitracin__bacA	k__Bacteria; p__Proteobacteria; c__Betaproteobacteria; o__Burkholderiales; f__Comamonadaceae; g__unclassified; s__unclassified		A,B,C,E
unigene_10584195	bacitracin	bacitracin__bacA	Unclassified		A,B,C,D
unigene_10597381	fosmidomycin	fosmidomycin__rosB	Unclassified		A,B,D,E
unigene_10671945	beta-lactam	beta-lactam__OXA-1	k__Bacteria; p__Proteobacteria; c__Gammaproteobacteria; o__Enterobacteriales; f__Enterobacteriaceae; g__unclassified; s__unclassified		A,B,C,E
unigene_10696573	bacitracin	bacitracin__bacA	k__Bacteria; p__Proteobacteria; c__Betaproteobacteria; o__Burkholderiales; f__Comamonadaceae; g__unclassified; s__unclassified		B,C
unigene_10701002	bacitracin	bacitracin__bacA	k__Bacteria; p__Proteobacteria; c__Betaproteobacteria; o__Burkholderiales; f__Burkholderiaceae; g__Polynucleobacter; s__Polynucleobacter necessarius		A,B,C,E
unigene_10704793	bacitracin	bacitracin__bacA	k__Bacteria; p__Proteobacteria; c__Betaproteobacteria; o__Burkholderiales; f__Comamonadaceae; g__Variovorax; s__Variovorax paradoxus		A,B,C,E,F
unigene_10743456	chloramphenicol	chloramphenicol__floR	Unclassified		A,B,C,E
unigene_10762128	bacitracin	bacitracin__bacA	k__Bacteria; p__Proteobacteria; c__Betaproteobacteria; o__Burkholderiales; f__Comamonadaceae; g__unclassified; s__unclassified		A,B,C,D,E
unigene_10763684	chloramphenicol	chloramphenicol__cmlA	k__Bacteria; p__Proteobacteria; c__Gammaproteobacteria; o__Enterobacteriales; f__Enterobacteriaceae; g__unclassified; s__unclassified		A,B,C,D,E
unigene_10768137	bacitracin	bacitracin__bacA	k__Bacteria; p__Proteobacteria; c__Betaproteobacteria; o__Burkholderiales; f__Comamonadaceae; g__unclassified; s__unclassified		A,B,C,E
unigene_10845002	multidrug	multidrug__mexF	Unclassified		A,B,D
unigene_10847020	aminoglycoside	aminoglycoside__aph(3'')-I	k__Bacteria; p__Proteobacteria; c__Gammaproteobacteria; o__unclassified; f__unclassified; g__unclassified; s__unclassified		A,B,C,E,F,G
unigene_10847040	aminoglycoside	aminoglycoside__aph(6)-I	k__Bacteria; p__Proteobacteria; c__Gammaproteobacteria; o__Enterobacteriales; f__Enterobacteriaceae; g__unclassified; s__unclassified		A,B,C,E
unigene_1084986	multidrug	multidrug__mdtB	Unclassified		B,E
unigene_10853681	multidrug	multidrug__mdtB	Unclassified		B,C,E
unigene_10854086	bacitracin	bacitracin__bacA	k__Bacteria; p__Proteobacteria; c__Betaproteobacteria; o__Burkholderiales; f__Comamonadaceae; g__Acidovorax; s__unclassified		A,B,C,E
unigene_10869616	bacitracin	bacitracin__bacA	Unclassified		A,B,C,E
unigene_10906389	bacitracin	bacitracin__bacA	Unclassified		A,B
unigene_10965898	beta-lactam	beta-lactam__GES-20	k__Bacteria; p__Proteobacteria; c__Gammaproteobacteria; o__Enterobacteriales; f__Enterobacteriaceae; g__Klebsiella; s__Klebsiella pneumoniae	Y	A,B,C,E
unigene_1100165	bacitracin	bacitracin__bacA	k__Bacteria; p__Proteobacteria; c__Betaproteobacteria; o__Burkholderiales; f__Comamonadaceae; g__unclassified; s__unclassified		A,B,C,E
unigene_11002032	bacitracin	bacitracin__bacA	k__Bacteria; p__Proteobacteria; c__Betaproteobacteria; o__Burkholderiales; f__Comamonadaceae; g__unclassified; s__unclassified		A,B,C,E
unigene_11056112	beta-lactam	beta-lactam__OXA-21	k__Bacteria; p__Proteobacteria; c__Gammaproteobacteria; o__Enterobacteriales; f__Enterobacteriaceae; g__unclassified; s__unclassified		E
unigene_11057114	bacitracin	bacitracin__bacA	Unclassified		A,B,D,E
unigene_11098690	sulfonamide	sulfonamide__sul1	k__Bacteria; p__Proteobacteria; c__Gammaproteobacteria; o__Enterobacteriales; f__Enterobacteriaceae; g__Klebsiella; s__unclassified		B,C,D
unigene_11159900	bacitracin	bacitracin__bacA	k__Bacteria; p__Proteobacteria; c__Betaproteobacteria; o__Burkholderiales; f__Comamonadaceae; g__Polaromonas; s__unclassified		A,B,C,E
unigene_11194050	bacitracin	bacitracin__bacA	Unclassified		F
unigene_1131226	multidrug	multidrug__mexF	Unclassified		D,E
unigene_1132474	bacitracin	bacitracin__bacA	k__Bacteria; p__Proteobacteria; c__Betaproteobacteria; o__Burkholderiales; f__Comamonadaceae; g__Limnohabitans; s__unclassified		A,B,C,E
unigene_11373891	bacitracin	bacitracin__bacA	Unclassified		A,B,C
unigene_11374652	multidrug	multidrug__EmrB-QacA family major facilitator transporter	Unclassified		A,B,C,E
unigene_11391454	bacitracin	bacitracin__bacA	k__Bacteria; p__Proteobacteria; c__Betaproteobacteria; o__Burkholderiales; f__Comamonadaceae; g__Acidovorax; s__unclassified		A,B,C,E
unigene_1141084	bacitracin	bacitracin__bacA	Unclassified		A,C,E
unigene_11439296	bacitracin	bacitracin__bacA	Unclassified		A,B,C,D,E
unigene_11461859	multidrug	multidrug__mdtB	Unclassified		A,B,E
unigene_11524328	bacitracin	bacitracin__bacA	Unclassified		B,E
unigene_11526195	bacitracin	bacitracin__bacA	k__Bacteria; p__Proteobacteria; c__Betaproteobacteria; o__Burkholderiales; f__Burkholderiaceae; g__Polynucleobacter; s__Polynucleobacter necessarius		A,B,C,E
unigene_11575881	aminoglycoside	aminoglycoside__aac(6')-30-aac(6')-Ib'	k__Bacteria; p__Proteobacteria; c__Gammaproteobacteria; o__Enterobacteriales; f__Enterobacteriaceae; g__unclassified; s__unclassified		B
unigene_11614168	bacitracin	bacitracin__bacA	k__Bacteria; p__Proteobacteria; c__Betaproteobacteria; o__Burkholderiales; f__Comamonadaceae; g__unclassified; s__unclassified		A,B,C,E
unigene_11621440	vancomycin	vancomycin__vanR	k__Bacteria; p__Actinobacteria; c__Actinobacteria; o__Actinomycetales; f__unclassified; g__unclassified; s__unclassified		B,D,E,F
unigene_11630864	bacitracin	bacitracin__bacA	Unclassified		A,B,C
unigene_11723172	bacitracin	bacitracin__bacA	Unclassified		A
unigene_11730963	beta-lactam	beta-lactam__CMY-1	Unclassified		A,B,C,E
unigene_11755499	multidrug	multidrug__mdtB	Unclassified		A,D
unigene_11774266	beta-lactam	beta-lactam__AER-1	k__Bacteria; p__Proteobacteria; c__Gammaproteobacteria; o__Pseudomonadales; f__Pseudomonadaceae; g__Pseudomonas; s__Pseudomonas putida	Y	B,C,E
unigene_11778755	multidrug	multidrug__acrB	Unclassified		A,B,C,D,E
unigene_11805768	bacitracin	bacitracin__bacA	Unclassified		B,C
unigene_11823841	bacitracin	bacitracin__bacA	k__Bacteria; p__Proteobacteria; c__Betaproteobacteria; o__Burkholderiales; f__Comamonadaceae; g__unclassified; s__unclassified		A,B,C,E
unigene_11839536	bacitracin	bacitracin__bacA	k__Bacteria; p__Proteobacteria; c__Betaproteobacteria; o__Nitrosomonadales; f__Nitrosomonadaceae; g__Nitrosospira; s__unclassified		D
unigene_11854452	bacitracin	bacitracin__bacA	k__Bacteria; p__Proteobacteria; c__Betaproteobacteria; o__Burkholderiales; f__Comamonadaceae; g__Acidovorax; s__unclassified		A,B
unigene_11880294	multidrug	multidrug__mexE	k__Bacteria; p__Proteobacteria; c__Gammaproteobacteria; o__Xanthomonadales; f__Xanthomonadaceae; g__Stenotrophomonas; s__Stenotrophomonas maltophilia	Y	A,B,C,E,F,G
unigene_11889925	multidrug	multidrug__multidrug_transporter	k__; p__; c__; o__; f__; g__; s__		A,B,C,E
unigene_11903276	multidrug	multidrug__mdtB	Unclassified		A,B,C,D,E
unigene_11911629	bacitracin	bacitracin__bacA	Unclassified		A,B,C,E
unigene_1198333	multidrug	multidrug__mdtB	Unclassified		A,C,D,E
unigene_12024071	aminoglycoside	aminoglycoside__ant(3'')-Ih-aac(6')-IId	k__Bacteria; p__Proteobacteria; c__Gammaproteobacteria; o__Enterobacteriales; f__Enterobacteriaceae; g__Klebsiella; s__Klebsiella pneumoniae	Y	C,E
unigene_12041757	tetracycline	tetracycline__tetA	k__Bacteria; p__unclassified; c__unclassified; o__unclassified; f__unclassified; g__unclassified; s__mixed culture bacterium MN_gF3SD01_16		B,C,E
unigene_12049016	beta-lactam	beta-lactam__GES-5	k__Bacteria; p__Proteobacteria; c__Gammaproteobacteria; o__Enterobacteriales; f__Enterobacteriaceae; g__unclassified; s__unclassified		A,B,C,D,E
unigene_12052152	bacitracin	bacitracin__bacA	Unclassified		A,B,C,E
unigene_12054839	bacitracin	bacitracin__bacA	k__Bacteria; p__Proteobacteria; c__Betaproteobacteria; o__Burkholderiales; f__Comamonadaceae; g__Acidovorax; s__Acidovorax sp. MR-S7		A,B,C,E
unigene_12099401	multidrug	multidrug__mdtB	Unclassified		A,B,C,E
unigene_12140993	tetracycline	tetracycline__tetV	Unclassified		A,F
unigene_1214242	bacitracin	bacitracin__bacA	Unclassified		B
unigene_12173249	beta-lactam	beta-lactam__class A beta-lactamase	k__Bacteria; p__Proteobacteria; c__Gammaproteobacteria; o__Pseudomonadales; f__Pseudomonadaceae; g__Pseudomonas; s__Pseudomonas aeruginosa	Y	A,B,C,D,E
unigene_12223590	beta-lactam	beta-lactam__GES-13	k__Bacteria; p__Proteobacteria; c__Gammaproteobacteria; o__Pseudomonadales; f__Moraxellaceae; g__Acinetobacter; s__Acinetobacter baumannii	Y	A,B,C,D,E
unigene_12246174	multidrug	multidrug__smeE	k__Bacteria; p__Proteobacteria; c__Gammaproteobacteria; o__Xanthomonadales; f__Xanthomonadaceae; g__Stenotrophomonas; s__Stenotrophomonas maltophilia	Y	A,B,C,D,E,F,G
unigene_12290134	multidrug	multidrug__qacEdelta1	k__Bacteria; p__Proteobacteria; c__Gammaproteobacteria; o__Enterobacteriales; f__Enterobacteriaceae; g__Enterobacter; s__Enterobacter aerogenes	Y	A,B,C,E
unigene_12292322	bacitracin	bacitracin__bacA	Unclassified		A
unigene_12309403	bacitracin	bacitracin__bacA	Unclassified		A,B,C,E
unigene_12377971	multidrug	multidrug__mdtB	Unclassified		A,C,E
unigene_12426136	sulfonamide	sulfonamide__sul2	k__Bacteria; p__Proteobacteria; c__Gammaproteobacteria; o__Pasteurellales; f__Pasteurellaceae; g__unclassified; s__unclassified		A,B,C,D,E,G
unigene_12430254	bacitracin	bacitracin__bacA	k__Bacteria; p__Proteobacteria; c__Betaproteobacteria; o__Burkholderiales; f__Comamonadaceae; g__unclassified; s__unclassified		A,B,C,D,E
unigene_12465083	bacitracin	bacitracin__bacA	k__Bacteria; p__Proteobacteria; c__Betaproteobacteria; o__Burkholderiales; f__Comamonadaceae; g__unclassified; s__unclassified		A,B,C,D,E
unigene_12476875	bacitracin	bacitracin__bacA	Unclassified		A,B,C
unigene_12487274	bacitracin	bacitracin__bacA	Unclassified		A,B,C,E
unigene_12505503	bacitracin	bacitracin__bacA	Unclassified		E
unigene_12513081	bacitracin	bacitracin__bacA	Unclassified		D
unigene_12534293	bacitracin	bacitracin__bacA	k__Bacteria; p__Proteobacteria; c__Gammaproteobacteria; o__Pseudomonadales; f__Pseudomonadaceae; g__Pseudomonas; s__Pseudomonas resinovorans		C,E
unigene_12657277	bacitracin	bacitracin__bacA	k__Bacteria; p__Proteobacteria; c__Betaproteobacteria; o__Burkholderiales; f__Comamonadaceae; g__Acidovorax; s__unclassified		A,B,C,D,E
unigene_12672989	bacitracin	bacitracin__bacA	Unclassified		B,C
unigene_12696835	rifamycin	rifamycin__ADP-ribosylating transferase_arr	k__Bacteria; p__Actinobacteria; c__Actinobacteria; o__Actinomycetales; f__Mycobacteriaceae; g__Mycobacterium; s__Mycobacterium smegmatis	Y	A
unigene_12716304	bacitracin	bacitracin__bacA	Unclassified		B,C,E
unigene_12721527	bacitracin	bacitracin__bacA	Unclassified		B,C,E
unigene_12741132	multidrug	multidrug__mdtB	Unclassified		D,E
unigene_12744956	kasugamycin	kasugamycin__kasugamycin resistance protein ksgA	Unclassified		B
unigene_1275988	bacitracin	bacitracin__bacA	k__Bacteria; p__Proteobacteria; c__Betaproteobacteria; o__Burkholderiales; f__Comamonadaceae; g__Acidovorax; s__unclassified		A,B,C,E
unigene_12836714	multidrug	multidrug__smeB	Unclassified		B,C,E,F,G
unigene_1287218	macrolide-lincosamide-streptogramin	macrolide-lincosamide-streptogramin__ereA	k__Bacteria; p__Proteobacteria; c__Gammaproteobacteria; o__Enterobacteriales; f__Enterobacteriaceae; g__unclassified; s__unclassified		A,B,C,D,E
unigene_12876771	chloramphenicol	chloramphenicol__floR	k__Bacteria; p__Proteobacteria; c__Gammaproteobacteria; o__unclassified; f__unclassified; g__unclassified; s__unclassified		A,B,C,D,E
unigene_12909174	bacitracin	bacitracin__bacA	Unclassified		A,B,C,E
unigene_12958807	bacitracin	bacitracin__bacA	Unclassified		B,C
unigene_12964936	trimethoprim	trimethoprim__dfrA1	k__Bacteria; p__Proteobacteria; c__Gammaproteobacteria; o__Enterobacteriales; f__Enterobacteriaceae; g__Salmonella; s__Salmonella enterica		C
unigene_12966856	bacitracin	bacitracin__bacA	Unclassified		A,C,E
unigene_13007333	bacitracin	bacitracin__bacA	Unclassified		A,B,E
unigene_13013130	multidrug	multidrug__mexF	Unclassified		D
unigene_13122266	bacitracin	bacitracin__bacA	Unclassified		B,C
unigene_13128971	bacitracin	bacitracin__bacA	Unclassified		A,B,C,E
unigene_13177888	bacitracin	bacitracin__bacA	k__Bacteria; p__Proteobacteria; c__Betaproteobacteria; o__Burkholderiales; f__Comamonadaceae; g__Acidovorax; s__unclassified		B,C,D,E
unigene_13203190	bacitracin	bacitracin__bacA	Unclassified		A,B,C
unigene_13208585	sulfonamide	sulfonamide__sul2	k__Bacteria; p__Proteobacteria; c__Gammaproteobacteria; o__Pasteurellales; f__Pasteurellaceae; g__unclassified; s__unclassified		A,B,C,D,E,G
unigene_13218893	bacitracin	bacitracin__bacA	Unclassified		B,C
unigene_13254369	bacitracin	bacitracin__bacA	k__Bacteria; p__Proteobacteria; c__Betaproteobacteria; o__Burkholderiales; f__Comamonadaceae; g__Acidovorax; s__unclassified		A,B
unigene_13265942	bacitracin	bacitracin__bacA	k__Bacteria; p__Proteobacteria; c__Betaproteobacteria; o__Burkholderiales; f__Burkholderiaceae; g__Polynucleobacter; s__Polynucleobacter necessarius		A,B,C
unigene_13309374	multidrug	multidrug__qacEdelta1	k__Bacteria; p__Proteobacteria; c__Gammaproteobacteria; o__Enterobacteriales; f__Enterobacteriaceae; g__unclassified; s__unclassified		A,B,C,D,E,F
unigene_13392686	bacitracin	bacitracin__bacA	Unclassified		A,B,C,E
unigene_13504320	aminoglycoside	aminoglycoside__aac(6')-I	k__Bacteria; p__Proteobacteria; c__Gammaproteobacteria; o__Pseudomonadales; f__Pseudomonadaceae; g__Pseudomonas; s__Pseudomonas aeruginosa	Y	A,B,C,E,F
unigene_13528533	multidrug	multidrug__mexW	Unclassified		F,G
unigene_13567839	beta-lactam	beta-lactam__class A beta-lactamase	k__Bacteria; p__Proteobacteria; c__Gammaproteobacteria; o__Pseudomonadales; f__Pseudomonadaceae; g__Pseudomonas; s__Pseudomonas aeruginosa	Y	B,C,D,E
unigene_13584555	aminoglycoside	aminoglycoside__aac(3)-I	Unclassified		B
unigene_13592479	tetracycline	tetracycline__tetG	k__Bacteria; p__Proteobacteria; c__Gammaproteobacteria; o__unclassified; f__unclassified; g__unclassified; s__unclassified		A,B,C,E
unigene_13649056	bacitracin	bacitracin__bacA	Unclassified		A,B,C,E
unigene_13653865	bacitracin	bacitracin__bacA	k__Bacteria; p__Proteobacteria; c__Betaproteobacteria; o__Burkholderiales; f__Comamonadaceae; g__Polaromonas; s__unclassified		A,B,C,E
unigene_13662887	rifamycin	rifamycin__ADP-ribosylating transferase_arr	k__Bacteria; p__Proteobacteria; c__Gammaproteobacteria; o__Pseudomonadales; f__unclassified; g__unclassified; s__unclassified		D,E
unigene_13695400	bacitracin	bacitracin__bacA	Unclassified		A,E
unigene_13705165	tetracycline	tetracycline__tetG	Unclassified		A,B,C,E
unigene_13720113	multidrug	multidrug__multidrug_transporter	Unclassified		D
unigene_13723830	bacitracin	bacitracin__bacA	Unclassified		A,B,C,E
unigene_13792539	beta-lactam	beta-lactam__VEB-1	k__Bacteria; p__Proteobacteria; c__Gammaproteobacteria; o__unclassified; f__unclassified; g__unclassified; s__unclassified		A,B,C
unigene_13903689	bacitracin	bacitracin__bacA	k__Bacteria; p__Proteobacteria; c__Betaproteobacteria; o__Burkholderiales; f__Burkholderiaceae; g__Polynucleobacter; s__Polynucleobacter necessarius		A,B,C,E
unigene_13909441	multidrug	multidrug__mdtB	Unclassified		A,B,C,E
unigene_13922604	bacitracin	bacitracin__bacA	k__Bacteria; p__Proteobacteria; c__Betaproteobacteria; o__Burkholderiales; f__Comamonadaceae; g__Acidovorax; s__unclassified		A,B,C,E
unigene_13986636	bacitracin	bacitracin__bacA	Unclassified		A,B,C,E
unigene_14002012	bacitracin	bacitracin__bacA	Unclassified		B
unigene_14014548	rifamycin	rifamycin__ADP-ribosylating transferase_arr	k__Bacteria; p__Proteobacteria; c__Gammaproteobacteria; o__Enterobacteriales; f__Enterobacteriaceae; g__Klebsiella; s__Klebsiella pneumoniae	Y	A,B,E
unigene_14055912	multidrug	multidrug__mexE	k__Bacteria; p__Proteobacteria; c__Gammaproteobacteria; o__Xanthomonadales; f__Xanthomonadaceae; g__Stenotrophomonas; s__Stenotrophomonas maltophilia	Y	A,B,C,E,F
unigene_14076160	multidrug	multidrug__mdtC	Unclassified		D,E
unigene_140969	macrolide-lincosamide-streptogramin	macrolide-lincosamide-streptogramin__ereA	k__Bacteria; p__Proteobacteria; c__unclassified; o__unclassified; f__unclassified; g__unclassified; s__unclassified		B,E
unigene_14097626	bacitracin	bacitracin__bacA	Unclassified		B,E
unigene_14149818	multidrug	multidrug__acrF	Unclassified		B,C
unigene_14172051	multidrug	multidrug__emrB	Unclassified		C
unigene_14225692	bacitracin	bacitracin__bacA	Unclassified		A,C,E
unigene_14251636	bacitracin	bacitracin__bacA	k__Bacteria; p__Proteobacteria; c__Betaproteobacteria; o__Burkholderiales; f__Comamonadaceae; g__unclassified; s__unclassified		A,B,C,D,E
unigene_14290062	bacitracin	bacitracin__bacA	Unclassified		A,B,C,E
unigene_14352759	polymyxin	polymyxin__arnA	Unclassified		A,D
unigene_14354364	rifamycin	rifamycin__ADP-ribosylating transferase_arr	k__Bacteria; p__Actinobacteria; c__Actinobacteria; o__Actinomycetales; f__Mycobacteriaceae; g__Mycobacterium; s__unclassified		F
unigene_14358369	bacitracin	bacitracin__bacA	Unclassified		B
unigene_14359859	multidrug	multidrug__multidrug_ABC_transporter	Unclassified		B
unigene_14387395	multidrug	multidrug__mexT	Unclassified		E
unigene_14429380	bacitracin	bacitracin__bacA	Unclassified		A,B
unigene_14434059	multidrug	multidrug__mdtB	Unclassified		A,B,C,D,E
unigene_14485445	macrolide-lincosamide-streptogramin	macrolide-lincosamide-streptogramin__ermF	k__Bacteria; p__Bacteroidetes; c__Bacteroidia; o__Bacteroidales; f__unclassified; g__unclassified; s__unclassified		A,B,C,E,G
unigene_1455609	bacitracin	bacitracin__bacA	Unclassified		A,B,C
unigene_14560835	trimethoprim	trimethoprim__dfrA5	k__Bacteria; p__Proteobacteria; c__Gammaproteobacteria; o__Enterobacteriales; f__Enterobacteriaceae; g__unclassified; s__unclassified		A,B,C,E
unigene_14569776	multidrug	multidrug__mdtB	Unclassified		A,B,C,D,E
unigene_14611678	bacitracin	bacitracin__bacA	k__Bacteria; p__Proteobacteria; c__Betaproteobacteria; o__Burkholderiales; f__Burkholderiaceae; g__Polynucleobacter; s__Polynucleobacter necessarius		A,B,C,E
unigene_14641618	bacitracin	bacitracin__bacA	k__Bacteria; p__Proteobacteria; c__Betaproteobacteria; o__Burkholderiales; f__Comamonadaceae; g__unclassified; s__unclassified		A,B,C,D,E
unigene_14700237	multidrug	multidrug__multidrug_transporter	Unclassified		D,E
unigene_14704902	bacitracin	bacitracin__bacA	k__Bacteria; p__Proteobacteria; c__Betaproteobacteria; o__Burkholderiales; f__Comamonadaceae; g__unclassified; s__unclassified		A,B,C,E
unigene_14716670	bacitracin	bacitracin__bacA	k__Bacteria; p__Proteobacteria; c__Betaproteobacteria; o__Burkholderiales; f__Comamonadaceae; g__unclassified; s__unclassified		A,B,C,D,E
unigene_14757351	bacitracin	bacitracin__bacA	Unclassified		B
unigene_14770500	multidrug	multidrug__multidrug_ABC_transporter	Unclassified		B,C,D
unigene_14804534	tetracycline	tetracycline__tetA	k__Bacteria; p__Proteobacteria; c__unclassified; o__unclassified; f__unclassified; g__unclassified; s__unclassified		A,B,C,E,G
unigene_14840005	multidrug	multidrug__mdtB	Unclassified		B,C,E
unigene_14858321	bacitracin	bacitracin__bacA	k__Bacteria; p__Proteobacteria; c__Betaproteobacteria; o__Burkholderiales; f__Comamonadaceae; g__unclassified; s__unclassified		B
unigene_14864046	tetracycline	tetracycline__tetA	k__Bacteria; p__Proteobacteria; c__Gammaproteobacteria; o__unclassified; f__unclassified; g__unclassified; s__unclassified		A,B,E
unigene_14924863	bacitracin	bacitracin__bacA	k__Bacteria; p__Proteobacteria; c__Betaproteobacteria; o__unclassified; f__unclassified; g__unclassified; s__beta proteobacterium SCGC AAA027-C02		A,B,C,E
unigene_14949116	bacitracin	bacitracin__bacA	Unclassified		A,B,C
unigene_14960074	bacitracin	bacitracin__bacA	k__Bacteria; p__Proteobacteria; c__Betaproteobacteria; o__Burkholderiales; f__Comamonadaceae; g__unclassified; s__unclassified		A,B,C,D
unigene_14974601	bacitracin	bacitracin__bacA	k__Bacteria; p__Proteobacteria; c__Betaproteobacteria; o__Burkholderiales; f__Comamonadaceae; g__unclassified; s__unclassified		A,C,E
unigene_14992368	bacitracin	bacitracin__bacA	Unclassified		A,B,C,E
unigene_15006583	bacitracin	bacitracin__bacA	Unclassified		B,E
unigene_15014254	aminoglycoside	aminoglycoside__ant(2'')-I	k__Bacteria; p__Proteobacteria; c__Gammaproteobacteria; o__Enterobacteriales; f__Enterobacteriaceae; g__Escherichia; s__Escherichia coli	Y	F,G
unigene_15047905	multidrug	multidrug__mexW	Unclassified		A,B,C,E
unigene_15096049	multidrug	multidrug__mexF	Unclassified		E
unigene_15102404	bacitracin	bacitracin__bacA	k__Bacteria; p__Proteobacteria; c__Betaproteobacteria; o__Burkholderiales; f__Oxalobacteraceae; g__unclassified; s__Oxalobacteraceae bacterium IMCC9480		A,C,E
unigene_15139643	multidrug	multidrug__mdtB	Unclassified		A,C,E
unigene_15158514	multidrug	multidrug__mdtB	Unclassified		A,B
unigene_15221820	multidrug	multidrug__mexW	Unclassified		A,B,C,E,F
unigene_15226639	bacitracin	bacitracin__bacA	k__Bacteria; p__Proteobacteria; c__Betaproteobacteria; o__Burkholderiales; f__Comamonadaceae; g__unclassified; s__unclassified		A,B,C,D,E
unigene_15243002	bacitracin	bacitracin__bacA	k__Bacteria; p__Proteobacteria; c__Betaproteobacteria; o__Burkholderiales; f__Comamonadaceae; g__unclassified; s__unclassified		A,B,C,E
unigene_15272983	chloramphenicol	chloramphenicol__catB	k__Bacteria; p__Proteobacteria; c__Gammaproteobacteria; o__Enterobacteriales; f__Enterobacteriaceae; g__unclassified; s__unclassified		A,B,C,E
unigene_1552375	bacitracin	bacitracin__bacA	k__Bacteria; p__Proteobacteria; c__Betaproteobacteria; o__Burkholderiales; f__Comamonadaceae; g__Acidovorax; s__unclassified		A,B,C,E
unigene_15561826	bacitracin	bacitracin__bacA	Unclassified		C
unigene_15582905	tetracycline	tetracycline__tetG	k__Bacteria; p__Proteobacteria; c__Gammaproteobacteria; o__Pseudomonadales; f__Pseudomonadaceae; g__Pseudomonas; s__Pseudomonas aeruginosa	Y	A,B,C,D
unigene_15634299	bacitracin	bacitracin__bacA	k__Bacteria; p__Proteobacteria; c__Betaproteobacteria; o__Burkholderiales; f__Comamonadaceae; g__Acidovorax; s__unclassified		A,B,C,E
unigene_15660308	bacitracin	bacitracin__bacA	k__Bacteria; p__Proteobacteria; c__Betaproteobacteria; o__Nitrosomonadales; f__Nitrosomonadaceae; g__Nitrosomonas; s__unclassified		B,C,D,E
unigene_15701853	multidrug	multidrug__mdtB	k__Bacteria; p__Proteobacteria; c__Betaproteobacteria; o__Burkholderiales; f__Oxalobacteraceae; g__Herbaspirillum; s__Herbaspirillum lusitanum		A,B,C,E
unigene_15734724	bacitracin	bacitracin__bacA	Unclassified		B,C,E
unigene_15764552	bacitracin	bacitracin__bacA	Unclassified		C,E
unigene_1579356	bacitracin	bacitracin__bacA	k__Bacteria; p__Proteobacteria; c__Betaproteobacteria; o__Burkholderiales; f__Comamonadaceae; g__Acidovorax; s__unclassified		A,B,C,D,E
unigene_15815097	bacitracin	bacitracin__bacA	Unclassified		A,D
unigene_15846746	bacitracin	bacitracin__bacA	k__Bacteria; p__Proteobacteria; c__Betaproteobacteria; o__unclassified; f__unclassified; g__unclassified; s__unclassified		A,B,C
unigene_15874677	bacitracin	bacitracin__bacA	Unclassified		D
unigene_1590086	bacitracin	bacitracin__bacA	Unclassified		A,C
unigene_15937196	multidrug	multidrug__smeD	k__Bacteria; p__Proteobacteria; c__Gammaproteobacteria; o__Xanthomonadales; f__Xanthomonadaceae; g__Stenotrophomonas; s__Stenotrophomonas maltophilia	Y	A,B,C,E,F,G
unigene_15950019	quinolone	quinolone__qepA	Unclassified		D
unigene_15966382	bacitracin	bacitracin__bacA	Unclassified		A,D,E
unigene_16058135	multidrug	multidrug__mdtB	Unclassified		A,B,C,E
unigene_16066548	multidrug	multidrug__emrE	k__Bacteria; p__Proteobacteria; c__Gammaproteobacteria; o__unclassified; f__unclassified; g__unclassified; s__unclassified		B,C
unigene_16104115	bacitracin	bacitracin__bacA	Unclassified		A,B,C,D,E
unigene_16192728	bacitracin	bacitracin__bacA	Unclassified		A,B,C,E
unigene_161973	bacitracin	bacitracin__bacA	Unclassified		A,B,C
unigene_16298535	bacitracin	bacitracin__bacA	Unclassified		B
unigene_16340893	vancomycin	vancomycin__vanR	k__Bacteria; p__Actinobacteria; c__Actinobacteria; o__Actinomycetales; f__Streptomycetaceae; g__unclassified; s__unclassified		A,C,D
unigene_16340936	aminoglycoside	aminoglycoside__aadA	k__Bacteria; p__Proteobacteria; c__Gammaproteobacteria; o__Pseudomonadales; f__Pseudomonadaceae; g__Pseudomonas; s__Pseudomonas aeruginosa	Y	A,B,E,F
unigene_16369998	multidrug	multidrug__mdtB	Unclassified		D
unigene_16406741	bacitracin	bacitracin__bacA	Unclassified		B,C
unigene_1648510	bacitracin	bacitracin__bacA	k__Bacteria; p__Proteobacteria; c__Betaproteobacteria; o__Burkholderiales; f__Comamonadaceae; g__Limnohabitans; s__unclassified		A,B,C,E
unigene_16632198	bacitracin	bacitracin__bacA	Unclassified		A,B,E
unigene_1671015	bacitracin	bacitracin__bacA	k__Bacteria; p__Proteobacteria; c__Betaproteobacteria; o__Burkholderiales; f__Burkholderiaceae; g__Polynucleobacter; s__Polynucleobacter necessarius		A,B,C,E
unigene_16789491	bacitracin	bacitracin__bacA	Unclassified		A,B,C,D,E,F
unigene_16789838	multidrug	multidrug__mexW	Unclassified		A,B,C,D,E,F
unigene_16859581	bacitracin	bacitracin__bacA	k__Bacteria; p__Proteobacteria; c__Gammaproteobacteria; o__Pseudomonadales; f__Pseudomonadaceae; g__Pseudomonas; s__Pseudomonas putida	Y	A,F,G
unigene_16913157	bacitracin	bacitracin__bacA	Unclassified		C
unigene_16958421	bacitracin	bacitracin__bacA	Unclassified		A,B,C,E
unigene_17020683	bacitracin	bacitracin__bacA	k__Bacteria; p__Proteobacteria; c__Betaproteobacteria; o__Burkholderiales; f__Comamonadaceae; g__unclassified; s__unclassified		A,B,C,E
unigene_1766889	bacitracin	bacitracin__bacA	k__Bacteria; p__Proteobacteria; c__Betaproteobacteria; o__Burkholderiales; f__Comamonadaceae; g__unclassified; s__unclassified		A,B,C,E
unigene_1784087	multidrug	multidrug__mdtB	k__Bacteria; p__Proteobacteria; c__Gammaproteobacteria; o__Pseudomonadales; f__Pseudomonadaceae; g__Pseudomonas; s__Pseudomonas aeruginosa	Y	A,B,C,E
unigene_183701	multidrug	multidrug__mdtB	Unclassified		B,E
unigene_1848610	bacitracin	bacitracin__bacA	Unclassified		A
unigene_1941658	bacitracin	bacitracin__bacA	Unclassified		A,B,C,E,F
unigene_1972418	bacitracin	bacitracin__bacA	Unclassified		B,C,E
unigene_2081880	bacitracin	bacitracin__bacA	k__Bacteria; p__Proteobacteria; c__Betaproteobacteria; o__Burkholderiales; f__Comamonadaceae; g__Acidovorax; s__unclassified		A,B,C
unigene_2105278	sulfonamide	sulfonamide__sul1	k__Bacteria; p__Proteobacteria; c__Gammaproteobacteria; o__unclassified; f__unclassified; g__unclassified; s__unclassified		A,B,C,D,E,F
unigene_2105299	multidrug	multidrug__qacEdelta1	k__Bacteria; p__Proteobacteria; c__Gammaproteobacteria; o__Enterobacteriales; f__Enterobacteriaceae; g__unclassified; s__unclassified		A,B,C,D,E,F
unigene_217994	bacitracin	bacitracin__bacA	Unclassified		A,B,D,E
unigene_2185146	bacitracin	bacitracin__bacA	k__Bacteria; p__Proteobacteria; c__Betaproteobacteria; o__Burkholderiales; f__Burkholderiaceae; g__Polynucleobacter; s__Polynucleobacter necessarius		A,B,C,E
unigene_2187922	bacitracin	bacitracin__bacA	Unclassified		A,B,C,E
unigene_2222335	multidrug	multidrug__emrE	k__Bacteria; p__Proteobacteria; c__Gammaproteobacteria; o__unclassified; f__unclassified; g__unclassified; s__unclassified		A,B,C,E
unigene_2236180	bacitracin	bacitracin__bacA	k__Bacteria; p__Proteobacteria; c__Betaproteobacteria; o__Burkholderiales; f__Comamonadaceae; g__unclassified; s__unclassified		A,B,C,D,E
unigene_2258444	bacitracin	bacitracin__bacA	Unclassified		A,C,E
unigene_2394788	bacitracin	bacitracin__bacA	k__Bacteria; p__Proteobacteria; c__Betaproteobacteria; o__Burkholderiales; f__Comamonadaceae; g__unclassified; s__unclassified		A,B,C,E
unigene_2442491	bacitracin	bacitracin__bacA	Unclassified		A,B,C
unigene_2530073	chloramphenicol	chloramphenicol__chloramphenicol exporter	Unclassified		A,B,C
unigene_2564748	multidrug	multidrug__mdtB	Unclassified		D
unigene_2659452	bacitracin	bacitracin__bacA	Unclassified		D
unigene_2672830	bacitracin	bacitracin__bacA	Unclassified		B,C,E
unigene_2793064	multidrug	multidrug__multidrug_transporter	Unclassified		B,C
unigene_2826121	aminoglycoside	aminoglycoside__aac(6')-II	k__Bacteria; p__Proteobacteria; c__Gammaproteobacteria; o__Pseudomonadales; f__Pseudomonadaceae; g__Pseudomonas; s__Pseudomonas aeruginosa	Y	A,B,C,E
unigene_2847970	beta-lactam	beta-lactam__metallo-beta-lactamase	k__Bacteria; p__Proteobacteria; c__Gammaproteobacteria; o__Xanthomonadales; f__Xanthomonadaceae; g__Stenotrophomonas; s__Stenotrophomonas maltophilia	Y	A,B,C,E,F,G
unigene_2889532	tetracycline	tetracycline__tetA	k__Bacteria; p__Proteobacteria; c__Gammaproteobacteria; o__unclassified; f__unclassified; g__unclassified; s__unclassified		A,B,C,D,E,G
unigene_2963042	multidrug	multidrug__mexE	k__Bacteria; p__Proteobacteria; c__Gammaproteobacteria; o__Xanthomonadales; f__Xanthomonadaceae; g__Stenotrophomonas; s__Stenotrophomonas maltophilia	Y	A,B,C,E,F,G
unigene_2963056	bacitracin	bacitracin__bacA	k__Bacteria; p__Proteobacteria; c__Betaproteobacteria; o__Burkholderiales; f__Comamonadaceae; g__unclassified; s__unclassified		A,B,C,E
unigene_2963064	multidrug	multidrug__smeB	k__Bacteria; p__Proteobacteria; c__Gammaproteobacteria; o__Xanthomonadales; f__Xanthomonadaceae; g__Stenotrophomonas; s__Stenotrophomonas maltophilia	Y	A,B,C,E,F,G
unigene_2963080	multidrug	multidrug__smeC	k__Bacteria; p__Proteobacteria; c__Gammaproteobacteria; o__Xanthomonadales; f__Xanthomonadaceae; g__Stenotrophomonas; s__Stenotrophomonas maltophilia	Y	A,B,C,E,F,G
unigene_3022862	multidrug	multidrug__mdtB	Unclassified		A,B,C,D,E,F
unigene_3034990	bacitracin	bacitracin__bacA	k__Bacteria; p__Proteobacteria; c__Betaproteobacteria; o__Burkholderiales; f__Comamonadaceae; g__unclassified; s__unclassified		B,C,E
unigene_3044754	multidrug	multidrug__mdtC	k__Bacteria; p__Acidobacteria; c__unclassified; o__unclassified; f__unclassified; g__unclassified; s__Acidobacteria bacterium JGI 0001001-H03		A,B,D,E
unigene_3057708	aminoglycoside	aminoglycoside__aadA	k__Bacteria; p__Proteobacteria; c__Gammaproteobacteria; o__Enterobacteriales; f__Enterobacteriaceae; g__Escherichia; s__Escherichia coli	Y	A,B,C,D,E,F
unigene_3067913	multidrug	multidrug__mdtB	Unclassified		C,D,E
unigene_3164257	bacitracin	bacitracin__bacA	k__Bacteria; p__Proteobacteria; c__Betaproteobacteria; o__Burkholderiales; f__Burkholderiaceae; g__Polynucleobacter; s__Polynucleobacter necessarius		A,B,C,E
unigene_3166463	bacitracin	bacitracin__bacA	Unclassified		B,C
unigene_316926	multidrug	multidrug__smeD	k__Bacteria; p__Proteobacteria; c__Gammaproteobacteria; o__Xanthomonadales; f__Xanthomonadaceae; g__Stenotrophomonas; s__Stenotrophomonas maltophilia	Y	A,B,C,E,F,G
unigene_3251043	bacitracin	bacitracin__bacA	k__Bacteria; p__Proteobacteria; c__Betaproteobacteria; o__Burkholderiales; f__Comamonadaceae; g__Acidovorax; s__unclassified		A,B,C,E
unigene_3256956	bacitracin	bacitracin__bacA	k__Bacteria; p__Proteobacteria; c__Betaproteobacteria; o__Burkholderiales; f__Comamonadaceae; g__Acidovorax; s__unclassified		A,B,C,E
unigene_3269599	multidrug	multidrug__smeD	k__Bacteria; p__Proteobacteria; c__Gammaproteobacteria; o__Xanthomonadales; f__Xanthomonadaceae; g__Stenotrophomonas; s__Stenotrophomonas maltophilia	Y	A,B,C,E,F
unigene_3269618	multidrug	multidrug__smeE	k__Bacteria; p__Proteobacteria; c__Gammaproteobacteria; o__Xanthomonadales; f__Xanthomonadaceae; g__Stenotrophomonas; s__Stenotrophomonas maltophilia	Y	A,B,C,E,F,G
unigene_3269636	multidrug	multidrug__multidrug_transporter	k__Bacteria; p__Proteobacteria; c__Gammaproteobacteria; o__Xanthomonadales; f__Xanthomonadaceae; g__Stenotrophomonas; s__Stenotrophomonas maltophilia	Y	A,B,C,E,F,G
unigene_3325220	bacitracin	bacitracin__bacA	Unclassified		B
unigene_3388030	bacitracin	bacitracin__bacA	Unclassified		A,C,E
unigene_3432800	bacitracin	bacitracin__bacA	k__Bacteria; p__Proteobacteria; c__Betaproteobacteria; o__Burkholderiales; f__Comamonadaceae; g__Acidovorax; s__Acidovorax sp. MR-S7		B,E
unigene_3438763	multidrug	multidrug__mdtC	Unclassified		B,D
unigene_3468053	bacitracin	bacitracin__bacA	k__Bacteria; p__Proteobacteria; c__Betaproteobacteria; o__Burkholderiales; f__Comamonadaceae; g__unclassified; s__unclassified		A,B,C,E
unigene_3521373	multidrug	multidrug__mdtB	k__; p__; c__; o__; f__; g__; s__		A,B,E
unigene_3572495	bacitracin	bacitracin__bacA	Unclassified		A,B,C,E
unigene_3597133	bacitracin	bacitracin__bacA	Unclassified		B,C,E
unigene_3639670	multidrug	multidrug__mdtB	Unclassified		A,B,C,D,E
unigene_3693716	bacitracin	bacitracin__bacA	k__Bacteria; p__Proteobacteria; c__Betaproteobacteria; o__Burkholderiales; f__Comamonadaceae; g__unclassified; s__unclassified		A,B,C,E
unigene_3708560	aminoglycoside	aminoglycoside__ant(2'')-I	k__Bacteria; p__Proteobacteria; c__Gammaproteobacteria; o__Enterobacteriales; f__Enterobacteriaceae; g__Klebsiella; s__Klebsiella pneumoniae	Y	A,B,C,E,F,G
unigene_3724865	aminoglycoside	aminoglycoside__aadA	k__Bacteria; p__Proteobacteria; c__Gammaproteobacteria; o__Enterobacteriales; f__Enterobacteriaceae; g__Klebsiella; s__Klebsiella pneumoniae	Y	A,B,C,E
unigene_3733207	multidrug	multidrug__acrB	Unclassified		A,B,C,D
unigene_3779255	multidrug	multidrug__multidrug_ABC_transporter	Unclassified		A,B,C,D,F
unigene_3780471	sulfonamide	sulfonamide__sul1	k__Bacteria; p__Proteobacteria; c__Gammaproteobacteria; o__Pseudomonadales; f__Moraxellaceae; g__Acinetobacter; s__Acinetobacter baumannii	Y	A,B,C,D,E,F
unigene_3790558	bacitracin	bacitracin__bacA	Unclassified		B,C,E
unigene_3829929	bacitracin	bacitracin__bacA	Unclassified		C
unigene_3837659	aminoglycoside	aminoglycoside__aph(6)-I	k__Bacteria; p__Proteobacteria; c__Gammaproteobacteria; o__Enterobacteriales; f__Enterobacteriaceae; g__unclassified; s__unclassified		A,B,C,E,G
unigene_3837660	aminoglycoside	aminoglycoside__aph(3'')-I	k__Bacteria; p__Proteobacteria; c__Gammaproteobacteria; o__unclassified; f__unclassified; g__unclassified; s__unclassified		B,C,E,G
unigene_3887566	chloramphenicol	chloramphenicol__floR	k__Bacteria; p__Proteobacteria; c__Alphaproteobacteria; o__unclassified; f__unclassified; g__unclassified; s__unclassified		A,B,C,D
unigene_391895	bacitracin	bacitracin__bacA	k__Bacteria; p__Proteobacteria; c__Betaproteobacteria; o__Burkholderiales; f__Comamonadaceae; g__Limnohabitans; s__unclassified		A,B,E
unigene_4001859	multidrug	multidrug__mdtB	Unclassified		A,B,C,D,E
unigene_4012299	aminoglycoside	aminoglycoside__aadA	k__Bacteria; p__Proteobacteria; c__Gammaproteobacteria; o__unclassified; f__unclassified; g__unclassified; s__unclassified		A,B,C,D,E,F
unigene_4012300	beta-lactam	beta-lactam__OXA-119	Unclassified		C,D,E
unigene_4017171	multidrug	multidrug__mdtB	Unclassified		C,E
unigene_4048371	bacitracin	bacitracin__bacA	k__Bacteria; p__Proteobacteria; c__Betaproteobacteria; o__Burkholderiales; f__Burkholderiaceae; g__Polynucleobacter; s__Polynucleobacter necessarius		A,B,C,E
unigene_4049052	bacitracin	bacitracin__bacA	k__Bacteria; p__Proteobacteria; c__Betaproteobacteria; o__Burkholderiales; f__Burkholderiaceae; g__Polynucleobacter; s__Polynucleobacter necessarius		A,B,C,E
unigene_4053320	bacitracin	bacitracin__bacA	Unclassified		A,B,C,E
unigene_4053861	bacitracin	bacitracin__bacA	k__Bacteria; p__Proteobacteria; c__Betaproteobacteria; o__Burkholderiales; f__Comamonadaceae; g__unclassified; s__unclassified		A,B,C,D,E
unigene_4060449	multidrug	multidrug__mdtC	Unclassified		A
unigene_4063084	aminoglycoside	aminoglycoside__aadA	k__Bacteria; p__Proteobacteria; c__Gammaproteobacteria; o__Enterobacteriales; f__Enterobacteriaceae; g__Klebsiella; s__Klebsiella pneumoniae	Y	C,E
unigene_4132070	multidrug	multidrug__multidrug_ABC_transporter	Unclassified		A,B,C,F
unigene_4183893	multidrug	multidrug__mdtB	Unclassified		A
unigene_4205857	bacitracin	bacitracin__bacA	Unclassified		A,B,C,D,E
unigene_4227126	tetracycline	tetracycline__tetA	k__Bacteria; p__Proteobacteria; c__Gammaproteobacteria; o__Enterobacteriales; f__Enterobacteriaceae; g__unclassified; s__unclassified		A,B,C,D,E
unigene_4239289	multidrug	multidrug__mdtB	Unclassified		C,E
unigene_4281999	bacitracin	bacitracin__bacA	k__Bacteria; p__Proteobacteria; c__Betaproteobacteria; o__Burkholderiales; f__Comamonadaceae; g__unclassified; s__unclassified		A,B,C,E
unigene_4290496	bacitracin	bacitracin__bacA	k__Bacteria; p__Proteobacteria; c__Betaproteobacteria; o__Burkholderiales; f__unclassified; g__Rubrivivax; s__Rubrivivax benzoatilyticus		A,B,D,E
unigene_4355759	bacitracin	bacitracin__bacA	k__Bacteria; p__Proteobacteria; c__Betaproteobacteria; o__Burkholderiales; f__Comamonadaceae; g__Acidovorax; s__unclassified		A,B,C,E
unigene_4457235	chloramphenicol	chloramphenicol__floR	k__Bacteria; p__Proteobacteria; c__Gammaproteobacteria; o__Pseudomonadales; f__Pseudomonadaceae; g__Pseudomonas; s__Pseudomonas aeruginosa	Y	A,B,C,D,E
unigene_4457255	sulfonamide	sulfonamide__sul1	k__Bacteria; p__Proteobacteria; c__Gammaproteobacteria; o__Pseudomonadales; f__Pseudomonadaceae; g__Pseudomonas; s__Pseudomonas aeruginosa	Y	A,B,C,D,E
unigene_4550025	aminoglycoside	aminoglycoside__ant(2'')-I	k__Bacteria; p__Proteobacteria; c__Gammaproteobacteria; o__Enterobacteriales; f__Enterobacteriaceae; g__Escherichia; s__Escherichia coli	Y	B,F,G
unigene_4603830	bacitracin	bacitracin__bacA	k__Bacteria; p__Proteobacteria; c__Betaproteobacteria; o__Burkholderiales; f__Comamonadaceae; g__Acidovorax; s__unclassified		B,C,E
unigene_4625657	multidrug	multidrug__mexF	Unclassified		A,E
unigene_4634735	multidrug	multidrug__mdtB	Unclassified		C,E
unigene_4683897	beta-lactam	beta-lactam__OXA-23	k__Bacteria; p__Proteobacteria; c__Gammaproteobacteria; o__Pseudomonadales; f__Moraxellaceae; g__Acinetobacter; s__Acinetobacter baumannii	Y	F,G
unigene_4686704	bacitracin	bacitracin__bacA	Unclassified		B
unigene_4686728	bacitracin	bacitracin__bacA	Unclassified		A,B,C,E
unigene_4728406	bacitracin	bacitracin__bacA	Unclassified		A,C
unigene_4768529	beta-lactam	beta-lactam__OXA-21	k__Bacteria; p__Proteobacteria; c__Gammaproteobacteria; o__Pseudomonadales; f__Pseudomonadaceae; g__Pseudomonas; s__unclassified		B,C,E
unigene_4768553	trimethoprim	trimethoprim__dfrA1	k__Bacteria; p__Proteobacteria; c__Gammaproteobacteria; o__Enterobacteriales; f__Enterobacteriaceae; g__unclassified; s__unclassified		B,C,E
unigene_4841295	bacitracin	bacitracin__bacA	k__Bacteria; p__Proteobacteria; c__Betaproteobacteria; o__Burkholderiales; f__Comamonadaceae; g__unclassified; s__unclassified		A,B,C,E
unigene_487441	multidrug	multidrug__acrB	Unclassified		B,C,E
unigene_4892345	bacitracin	bacitracin__bacA	Unclassified		A,B,C,E
unigene_4907310	rifamycin	rifamycin__rifampin monooxygenase	k__Bacteria; p__Actinobacteria; c__Actinobacteria; o__Actinomycetales; f__Nocardiaceae; g__Rhodococcus; s__Rhodococcus erythropolis	Y	A,F
unigene_49864	aminoglycoside	aminoglycoside__aph(3')-IIb	k__Bacteria; p__Proteobacteria; c__Gammaproteobacteria; o__Xanthomonadales; f__Xanthomonadaceae; g__Stenotrophomonas; s__Stenotrophomonas maltophilia	Y	A,B,C,E,F,G
unigene_4987936	bacitracin	bacitracin__bacA	k__Bacteria; p__Proteobacteria; c__Betaproteobacteria; o__Burkholderiales; f__Comamonadaceae; g__unclassified; s__unclassified		A,B,C,D,E
unigene_5015216	multidrug	multidrug__mdtB	Unclassified		D,E
unigene_5025888	tetracycline	tetracycline__tetA	k__Bacteria; p__Proteobacteria; c__Gammaproteobacteria; o__unclassified; f__unclassified; g__unclassified; s__unclassified		A,B,C,E
unigene_5170966	bacitracin	bacitracin__bacA	k__Bacteria; p__Proteobacteria; c__Betaproteobacteria; o__Burkholderiales; f__Comamonadaceae; g__unclassified; s__unclassified		A,B,C,E
unigene_5188787	bacitracin	bacitracin__bacA	k__Bacteria; p__Proteobacteria; c__Betaproteobacteria; o__Burkholderiales; f__Comamonadaceae; g__Ramlibacter; s__Ramlibacter tataouinensis		A,B,C,D,E
unigene_5243996	tetracycline	tetracycline__tetL	k__Bacteria; p__Firmicutes; c__Bacilli; o__Lactobacillales; f__unclassified; g__unclassified; s__unclassified		B,F,G
unigene_5245894	bacitracin	bacitracin__bacA	k__Bacteria; p__Proteobacteria; c__Betaproteobacteria; o__Burkholderiales; f__Comamonadaceae; g__unclassified; s__unclassified		A,B,C,D,E
unigene_5248174	bacitracin	bacitracin__bacA	k__Bacteria; p__Proteobacteria; c__Betaproteobacteria; o__Burkholderiales; f__Comamonadaceae; g__unclassified; s__unclassified		A,B,C,E
unigene_5255307	multidrug	multidrug__smeB	Unclassified		A,B,C,E,F
unigene_5257595	bacitracin	bacitracin__bacA	k__Bacteria; p__Proteobacteria; c__Betaproteobacteria; o__Burkholderiales; f__Comamonadaceae; g__unclassified; s__unclassified		A,B,C,D,E,F
unigene_5307442	bacitracin	bacitracin__bacA	Unclassified		A
unigene_535813	multidrug	multidrug__mexW	Unclassified		A,C,E
unigene_5416076	multidrug	multidrug__smeB	k__Bacteria; p__Proteobacteria; c__Gammaproteobacteria; o__Xanthomonadales; f__Xanthomonadaceae; g__Stenotrophomonas; s__Stenotrophomonas maltophilia	Y	A,B,C,E,F,G
unigene_5481299	bacitracin	bacitracin__bacA	k__Bacteria; p__Proteobacteria; c__Betaproteobacteria; o__Burkholderiales; f__Comamonadaceae; g__Acidovorax; s__unclassified		B
unigene_5494005	bacitracin	bacitracin__bacA	k__Bacteria; p__Proteobacteria; c__Betaproteobacteria; o__Burkholderiales; f__Comamonadaceae; g__unclassified; s__unclassified		A,C,E
unigene_5512250	trimethoprim	trimethoprim__dfrA1	k__Bacteria; p__Proteobacteria; c__Gammaproteobacteria; o__Enterobacteriales; f__Enterobacteriaceae; g__unclassified; s__unclassified		A,B,C,E
unigene_551251	bacitracin	bacitracin__bacA	Unclassified		A,B,C,E
unigene_5537335	macrolide-lincosamide-streptogramin	macrolide-lincosamide-streptogramin__ereA	Unclassified		A,B,C,D,E
unigene_5548259	bacitracin	bacitracin__bacA	Unclassified		A,B,C,E
unigene_5561555	bacitracin	bacitracin__bacA	k__Bacteria; p__Proteobacteria; c__Betaproteobacteria; o__Burkholderiales; f__Comamonadaceae; g__Acidovorax; s__unclassified		A,B,C
unigene_567289	aminoglycoside	aminoglycoside__aph(3'')-I	Unclassified		B,G
unigene_57290	bacitracin	bacitracin__bacA	Unclassified		A,B,C,D,E,F
unigene_5773148	bacitracin	bacitracin__bacA	Unclassified		A,B,C,E
unigene_5807822	bacitracin	bacitracin__bacA	Unclassified		A,C,E
unigene_5838185	bacitracin	bacitracin__bacA	k__Bacteria; p__Proteobacteria; c__Betaproteobacteria; o__Burkholderiales; f__Burkholderiaceae; g__Polynucleobacter; s__Polynucleobacter necessarius		B,C,E
unigene_5938282	sulfonamide	sulfonamide__sul1	k__Bacteria; p__Proteobacteria; c__Gammaproteobacteria; o__unclassified; f__unclassified; g__unclassified; s__unclassified		A,B,C,D,E
unigene_598050	multidrug	multidrug__mdtB	Unclassified		A,B,C,E
unigene_6054753	chloramphenicol	chloramphenicol__floR	k__Bacteria; p__Proteobacteria; c__unclassified; o__unclassified; f__unclassified; g__unclassified; s__unclassified		A,B,C,D,E
unigene_609931	macrolide-lincosamide-streptogramin	macrolide-lincosamide-streptogramin__ereA	k__Bacteria; p__Proteobacteria; c__unclassified; o__unclassified; f__unclassified; g__unclassified; s__unclassified		A,B,C,D,E
unigene_6109084	multidrug	multidrug__mdtB	Unclassified		B,C,E
unigene_6153103	bacitracin	bacitracin__bacA	k__Bacteria; p__Proteobacteria; c__Betaproteobacteria; o__Burkholderiales; f__Comamonadaceae; g__unclassified; s__unclassified		A,B,C,E
unigene_6172144	multidrug	multidrug__mexF	Unclassified		A,B
unigene_6175856	rifamycin	rifamycin__rifampin monooxygenase	k__Bacteria; p__Actinobacteria; c__Actinobacteria; o__Actinomycetales; f__Nocardiaceae; g__Rhodococcus; s__Rhodococcus erythropolis	Y	A,B,C,F,G
unigene_6184723	bacitracin	bacitracin__bacA	Unclassified		A,B,C,E
unigene_6207361	multidrug	multidrug__acrB	Unclassified		B,C
unigene_6344299	bacitracin	bacitracin__bacA	Unclassified		A,B,C,E
unigene_6365174	bacitracin	bacitracin__bacA	Unclassified		B,C,E
unigene_6415743	bacitracin	bacitracin__bacA	k__Bacteria; p__Proteobacteria; c__Betaproteobacteria; o__Burkholderiales; f__Burkholderiaceae; g__Polynucleobacter; s__Polynucleobacter necessarius		A,B,C,E
unigene_6440026	bacitracin	bacitracin__bacA	Unclassified		A,B,C
unigene_6466934	bacitracin	bacitracin__bacA	k__Bacteria; p__Proteobacteria; c__Betaproteobacteria; o__Burkholderiales; f__Comamonadaceae; g__unclassified; s__unclassified		A,B,C,E
unigene_6565003	beta-lactam	beta-lactam__OXA-21	k__Bacteria; p__Proteobacteria; c__Gammaproteobacteria; o__Pseudomonadales; f__Pseudomonadaceae; g__Pseudomonas; s__Pseudomonas aeruginosa	Y	A,B,C,D,E
unigene_6565249	trimethoprim	trimethoprim__dfrA1	k__Bacteria; p__Proteobacteria; c__Gammaproteobacteria; o__unclassified; f__unclassified; g__unclassified; s__unclassified		A,B,C,E
unigene_6629274	rifamycin	rifamycin__ADP-ribosylating transferase_arr	k__Bacteria; p__Actinobacteria; c__Actinobacteria; o__Actinomycetales; f__Mycobacteriaceae; g__Mycobacterium; s__unclassified		F
unigene_664034	multidrug	multidrug__mdtB	Unclassified		A,B,C,E
unigene_6665896	multidrug	multidrug__mdtB	Unclassified		A,B,C,E
unigene_667156	bacitracin	bacitracin__bacA	Unclassified		A,B,C,E
unigene_6674630	rifamycin	rifamycin__ADP-ribosylating transferase_arr	k__Bacteria; p__Actinobacteria; c__Actinobacteria; o__Actinomycetales; f__Mycobacteriaceae; g__Mycobacterium; s__unclassified		F
unigene_6775232	bacitracin	bacitracin__bacA	Unclassified		B,C,E
unigene_6853442	bacitracin	bacitracin__bacA	Unclassified		C
unigene_6858248	multidrug	multidrug__mdtB	Unclassified		A,C
unigene_6930540	aminoglycoside	aminoglycoside__aadA	k__Bacteria; p__Proteobacteria; c__Gammaproteobacteria; o__Enterobacteriales; f__Enterobacteriaceae; g__unclassified; s__unclassified		A,B,C,E,G
unigene_6978273	tetracycline	tetracycline__tetG	k__Bacteria; p__Proteobacteria; c__Gammaproteobacteria; o__unclassified; f__unclassified; g__unclassified; s__unclassified		B,C
unigene_6998544	bacitracin	bacitracin__bacA	Unclassified		A
unigene_700990	bacitracin	bacitracin__bacA	Unclassified		B,C,E
unigene_7030212	bacitracin	bacitracin__bacA	k__Bacteria; p__Proteobacteria; c__Betaproteobacteria; o__Burkholderiales; f__Comamonadaceae; g__Polaromonas; s__unclassified		A,B,C,D,E
unigene_7068086	bacitracin	bacitracin__bacA	Unclassified		B,C,E
unigene_7098866	bacitracin	bacitracin__bacA	k__Bacteria; p__Proteobacteria; c__Betaproteobacteria; o__Burkholderiales; f__Comamonadaceae; g__Acidovorax; s__unclassified		A,B,E
unigene_7194757	multidrug	multidrug__acrB	Unclassified		C,E
unigene_7216483	bacitracin	bacitracin__bacA	Unclassified		A
unigene_721710	multidrug	multidrug__mdtB	Unclassified		A,D,E
unigene_7220408	bacitracin	bacitracin__bacA	Unclassified		B
unigene_7243627	bacitracin	bacitracin__bacA	k__Bacteria; p__Proteobacteria; c__Betaproteobacteria; o__Burkholderiales; f__Burkholderiaceae; g__Polynucleobacter; s__Polynucleobacter necessarius		B
unigene_7251305	multidrug	multidrug__mdtC	Unclassified		A,B
unigene_7262450	bacitracin	bacitracin__bacA	k__Bacteria; p__Proteobacteria; c__Betaproteobacteria; o__Burkholderiales; f__Comamonadaceae; g__unclassified; s__unclassified		A,B,C,E
unigene_7279910	bacitracin	bacitracin__bacA	Unclassified		B
unigene_7366005	aminoglycoside	aminoglycoside__aadA	k__Bacteria; p__Proteobacteria; c__Gammaproteobacteria; o__Enterobacteriales; f__Enterobacteriaceae; g__unclassified; s__unclassified		A,B,C,D,E,F
unigene_7559883	multidrug	multidrug__amrB	Unclassified		B
unigene_7567533	multidrug	multidrug__multidrug_transporter	Unclassified		A,B,C,D,E
unigene_7569789	bacitracin	bacitracin__bacA	k__Bacteria; p__Proteobacteria; c__Betaproteobacteria; o__Burkholderiales; f__Burkholderiaceae; g__Polynucleobacter; s__Polynucleobacter necessarius		C,E
unigene_7589058	multidrug	multidrug__multidrug_ABC_transporter	Unclassified		D
unigene_7637604	bacitracin	bacitracin__bacA	k__Bacteria; p__Proteobacteria; c__Betaproteobacteria; o__Burkholderiales; f__Burkholderiaceae; g__Polynucleobacter; s__Polynucleobacter necessarius		A,B,C,E,F
unigene_7638837	bacitracin	bacitracin__bacA	Unclassified		A,B,C,E
unigene_7652752	beta-lactam	beta-lactam__CMY-1	k__Bacteria; p__Proteobacteria; c__Gammaproteobacteria; o__Enterobacteriales; f__Enterobacteriaceae; g__unclassified; s__unclassified		A,B,C,E
unigene_7865783	multidrug	multidrug__multidrug_ABC_transporter	Unclassified		B
unigene_7881981	bacitracin	bacitracin__bacA	k__Bacteria; p__Proteobacteria; c__Betaproteobacteria; o__Burkholderiales; f__Comamonadaceae; g__unclassified; s__unclassified		B
unigene_7911827	beta-lactam	beta-lactam__OXA-3	Unclassified		C
unigene_7997697	bacitracin	bacitracin__bacA	Unclassified		C,E
unigene_8006016	multidrug	multidrug__multidrug_transporter	Unclassified		B,C,D
unigene_8032102	bacitracin	bacitracin__bacA	Unclassified		C,F
unigene_8083824	bacitracin	bacitracin__bacA	k__Bacteria; p__Proteobacteria; c__Betaproteobacteria; o__Burkholderiales; f__Comamonadaceae; g__unclassified; s__unclassified		A,B,C,D,E
unigene_8093380	multidrug	multidrug__mdtB	Unclassified		A,B,C,E
unigene_8101194	sulfonamide	sulfonamide__sul4	Unclassified		A,B,C,E
unigene_8142375	bacitracin	bacitracin__bacA	Unclassified		C
unigene_8226130	beta-lactam	beta-lactam__OXA-10	k__Bacteria; p__Proteobacteria; c__Gammaproteobacteria; o__Enterobacteriales; f__Enterobacteriaceae; g__unclassified; s__unclassified		A,B,C,D,E
unigene_8248357	multidrug	multidrug__multidrug_transporter	Unclassified		A,B,C,E
unigene_8275063	multidrug	multidrug__smeE	k__Bacteria; p__Proteobacteria; c__Gammaproteobacteria; o__Xanthomonadales; f__Xanthomonadaceae; g__Stenotrophomonas; s__Stenotrophomonas maltophilia	Y	A,B,C,E,F,G
unigene_8295833	bacitracin	bacitracin__bacA	Unclassified		A,B,C,E
unigene_8319073	bacitracin	bacitracin__bacA	Unclassified		A,B,C,E
unigene_8329815	multidrug	multidrug__mdtB	Unclassified		A
unigene_8348127	tetracycline	tetracycline__tetA	k__Bacteria; p__Proteobacteria; c__Gammaproteobacteria; o__Pseudomonadales; f__Pseudomonadaceae; g__Pseudomonas; s__Pseudomonas aeruginosa	Y	E
unigene_8382939	bacitracin	bacitracin__bacA	k__Bacteria; p__Proteobacteria; c__Betaproteobacteria; o__Burkholderiales; f__Comamonadaceae; g__Polaromonas; s__unclassified		A,B,C,E
unigene_8386914	bacitracin	bacitracin__bacA	k__Bacteria; p__Proteobacteria; c__Betaproteobacteria; o__Burkholderiales; f__Comamonadaceae; g__unclassified; s__unclassified		A,B,C,D,E,F
unigene_8387431	bacitracin	bacitracin__bacA	k__Bacteria; p__Proteobacteria; c__Betaproteobacteria; o__Burkholderiales; f__Comamonadaceae; g__Acidovorax; s__unclassified		A,B,C,E
unigene_8394129	bacitracin	bacitracin__bacA	k__Bacteria; p__Proteobacteria; c__Betaproteobacteria; o__Burkholderiales; f__Comamonadaceae; g__unclassified; s__unclassified		A,B,C,E
unigene_8429450	bacitracin	bacitracin__bacA	k__Bacteria; p__Proteobacteria; c__Betaproteobacteria; o__Burkholderiales; f__Comamonadaceae; g__unclassified; s__unclassified		A,B,C,D,E
unigene_8439648	multidrug	multidrug__mdtB	Unclassified		D,E
unigene_8453779	bacitracin	bacitracin__bacA	k__Bacteria; p__Proteobacteria; c__Betaproteobacteria; o__Burkholderiales; f__Comamonadaceae; g__unclassified; s__unclassified		A,B,C,E
unigene_8458543	tetracycline	tetracycline__tetA	k__Bacteria; p__unclassified; c__unclassified; o__unclassified; f__unclassified; g__unclassified; s__unclassified		A,B,C,D,E,G
unigene_8461620	bacitracin	bacitracin__bacA	Unclassified		A,B,C,E
unigene_8464745	bacitracin	bacitracin__bacA	k__Bacteria; p__Proteobacteria; c__Betaproteobacteria; o__Burkholderiales; f__Burkholderiaceae; g__Polynucleobacter; s__Polynucleobacter necessarius		A,B,C,E
unigene_8527296	bacitracin	bacitracin__bacA	k__Bacteria; p__Proteobacteria; c__Betaproteobacteria; o__Burkholderiales; f__Comamonadaceae; g__Acidovorax; s__unclassified		A,B,C,D,E
unigene_8625141	tetracycline	tetracycline__tetA	k__; p__; c__; o__; f__; g__; s__		A,B,C,D,E,G
unigene_8633831	tetracycline	tetracycline__tetA	Unclassified		A,B,C,D,E
unigene_8649401	bacitracin	bacitracin__bacA	k__Bacteria; p__Proteobacteria; c__Betaproteobacteria; o__Burkholderiales; f__Comamonadaceae; g__unclassified; s__unclassified		A,B,C,E
unigene_8666066	multidrug	multidrug__mdtB	Unclassified		A,B,C,E
unigene_8684577	bacitracin	bacitracin__bacA	Unclassified		A,B,C,E
unigene_8701335	aminoglycoside	aminoglycoside__aadA	k__Bacteria; p__Proteobacteria; c__Gammaproteobacteria; o__Enterobacteriales; f__Enterobacteriaceae; g__Escherichia; s__Escherichia coli	Y	C,E
unigene_8701350	sulfonamide	sulfonamide__sul4	k__Bacteria; p__Firmicutes; c__Clostridia; o__unclassified; f__unclassified; g__unclassified; s__unclassified		A,B,C,D,E
unigene_8715504	bacitracin	bacitracin__bacA	k__Bacteria; p__Proteobacteria; c__Betaproteobacteria; o__Burkholderiales; f__Comamonadaceae; g__unclassified; s__unclassified		A,B,C,E
unigene_8721472	multidrug	multidrug__multidrug_transporter	Unclassified		A,B,C
unigene_8815414	bacitracin	bacitracin__bacA	Unclassified		A
unigene_8924888	bacitracin	bacitracin__bacA	k__Bacteria; p__Proteobacteria; c__Betaproteobacteria; o__Burkholderiales; f__Comamonadaceae; g__Acidovorax; s__unclassified		A,B,C,E
unigene_9046330	multidrug	multidrug__mexW	Unclassified		C,E
unigene_9060602	bacitracin	bacitracin__bacA	Unclassified		E
unigene_9061798	bacitracin	bacitracin__bacA	k__Bacteria; p__Proteobacteria; c__Betaproteobacteria; o__Burkholderiales; f__Burkholderiaceae; g__Polynucleobacter; s__Polynucleobacter necessarius		A,B,C,D,E,F
unigene_9102881	macrolide-lincosamide-streptogramin	macrolide-lincosamide-streptogramin__mphA	k__Bacteria; p__Proteobacteria; c__Gammaproteobacteria; o__Enterobacteriales; f__Enterobacteriaceae; g__Escherichia; s__Escherichia coli	Y	A,B,C,E
unigene_9147442	multidrug	multidrug__mexW	Unclassified		A,B,C,D,E
unigene_9178461	polymyxin	polymyxin__icr-Mo	k__Bacteria; p__Firmicutes; c__Bacilli; o__Bacillales; f__Paenibacillaceae; g__Paenibacillus; s__Paenibacillus sophorae		G
unigene_9219760	chloramphenicol	chloramphenicol__catB	k__Bacteria; p__Proteobacteria; c__Gammaproteobacteria; o__unclassified; f__unclassified; g__unclassified; s__unclassified		A,B,C,E
unigene_9251562	quinolone	quinolone__qepA	k__Bacteria; p__Proteobacteria; c__Gammaproteobacteria; o__Enterobacteriales; f__Enterobacteriaceae; g__Escherichia; s__Escherichia coli	Y	A,B,C,D
unigene_9276905	bacitracin	bacitracin__bacA	k__Bacteria; p__Proteobacteria; c__Betaproteobacteria; o__Burkholderiales; f__Comamonadaceae; g__unclassified; s__unclassified		A,B,C,D
unigene_9281127	bacitracin	bacitracin__bacA	k__Bacteria; p__Proteobacteria; c__Betaproteobacteria; o__Burkholderiales; f__Comamonadaceae; g__unclassified; s__unclassified		C
unigene_9293966	multidrug	multidrug__mdtB	Unclassified		D
unigene_9321779	multidrug	multidrug__multidrug_transporter	Unclassified		B,C,E
unigene_9345996	bacitracin	bacitracin__bacA	k__Bacteria; p__Proteobacteria; c__Betaproteobacteria; o__Burkholderiales; f__Comamonadaceae; g__Acidovorax; s__unclassified		A,B,C,D,E
unigene_9374721	bacitracin	bacitracin__bacA	k__Bacteria; p__Proteobacteria; c__Betaproteobacteria; o__Burkholderiales; f__Comamonadaceae; g__Acidovorax; s__unclassified		A,B,C,E
unigene_9390077	bacitracin	bacitracin__bacA	Unclassified		A,B,C,E
unigene_9417424	bacitracin	bacitracin__bacA	k__Bacteria; p__Proteobacteria; c__Betaproteobacteria; o__Burkholderiales; f__Comamonadaceae; g__unclassified; s__unclassified		A,B,C,D,E
unigene_9465155	bacitracin	bacitracin__bacA	Unclassified		A,B,C,E
unigene_9482035	trimethoprim	trimethoprim__dfrA17	k__Bacteria; p__Proteobacteria; c__Gammaproteobacteria; o__Enterobacteriales; f__Enterobacteriaceae; g__Escherichia; s__Escherichia coli	Y	A,B,C,E
unigene_9532752	multidrug	multidrug__mdtB	Unclassified		A,B,C
unigene_955535	aminoglycoside	aminoglycoside__aac(6')-II	k__Bacteria; p__Proteobacteria; c__Gammaproteobacteria; o__Pseudomonadales; f__Pseudomonadaceae; g__Pseudomonas; s__Pseudomonas aeruginosa	Y	A,B,C,E
unigene_9616793	bacitracin	bacitracin__bacA	Unclassified		B,E
unigene_9628393	aminoglycoside	aminoglycoside__aadA	k__Bacteria; p__Proteobacteria; c__Gammaproteobacteria; o__Enterobacteriales; f__Enterobacteriaceae; g__unclassified; s__unclassified		A,B,C,D,E
unigene_9638091	bacitracin	bacitracin__bacA	Unclassified		A,B,C,E
unigene_9657984	multidrug	multidrug__mexF	Unclassified		A
unigene_966645	multidrug	multidrug__mdtB	Unclassified		A,B,C,E
unigene_9716389	chloramphenicol	chloramphenicol__catB	k__Bacteria; p__Proteobacteria; c__Gammaproteobacteria; o__Enterobacteriales; f__Enterobacteriaceae; g__unclassified; s__unclassified		A,B,C,E,G
unigene_9781543	bacitracin	bacitracin__bacA	k__Bacteria; p__Proteobacteria; c__Betaproteobacteria; o__Burkholderiales; f__Comamonadaceae; g__unclassified; s__unclassified		A,B,C,D,E
unigene_9799940	bacitracin	bacitracin__bacA	k__Bacteria; p__Proteobacteria; c__Betaproteobacteria; o__Burkholderiales; f__Burkholderiaceae; g__Polynucleobacter; s__Polynucleobacter necessarius		A,B,C
unigene_9843149	bacitracin	bacitracin__bacA	Unclassified		A,B,C,E
unigene_9862000	multidrug	multidrug__mdtB	Unclassified		D
unigene_9991620	bacitracin	bacitracin__bacA	Unclassified		A,B,C,E
